# Supplementary material
Source: publisher figshare collection journal article supplement (https://tandf.figshare.com/articles/dataset/_/5547628)
Supplement: Supplementary file 2 [file 1]

*Fisheries* 42:538–553, 2017  
American Fisheries Society 2017  
DOI: 10.1080/03632415.2017.1374251

## REFERENCES

- Abdul-Aziz, O. I., N. J. Mantua, and K. W. Myers. 2011. Potential climate change impacts on thermal habitats of Pacific Salmon (*Oncorhynchus* spp.) in the North Pacific Ocean and adjacent seas. *Canadian Journal of Fisheries and Aquatic Sciences* 68(9):1660–1680.
- ADFG (Alaska Department of Fish and Game). 2013. Chinook Salmon stock assessment and research plan. Alaska Department of Fish and Game, Anchorage.
- . 2017. Anadromous waters catalog. Available: <http://adfg.alaska.gov/sf/SARR/AWC>. (July 2017).
- Alaska Center for Conservation Science. 2017. Alaska exotic plants information clearinghouse (AKEPIC). Available: <http://accs.uaa.alaska.edu/invasive-species/non-native-plants>. (July 2017).
- Alaska Department of Labor and Workforce Development. 2016. 2015 Population estimates by borough, census area, and economic region. Available: <http://live.laborstats.alaska.gov/pop/index.cfm7>. (July 2017).
- Alaska EPSCoR. 2017. Environmental change on the Kenai Peninsula from 1950 to 2013. Available: <https://ak-nsf-epscor.github.io/kenai-change>. (August 2017).
- Albert, D. M., and J. W. Schoen. 2013. Use of historical logging patterns to identify disproportionately logged ecosystems within temperate rainforests of southeastern Alaska. *Conservation Biology* 27(4):774–784.

- Allan, J. D., M. S. Wipfli, J. P. Caouette, A. Prussian, and J. Rodgers. 2003. Influence of streamside vegetation on inputs of terrestrial invertebrates to salmonid food webs. *Canadian Journal of Fisheries and Aquatic Sciences* 60(3):309–320.
- Amoroso, R. O., M. D. Tillotson, and R. Hilborn. 2017. Measuring the net biological impact of fisheries enhancement: Pink Salmon hatcheries can increase yield, but with apparent costs to wild populations. *Canadian Journal of Fisheries and Aquatic Sciences* 74(8): 1233-1242.
- Aplet, G. H., and P. S. McKinley. 2017. A portfolio approach to managing ecological risks of global change. *Ecosystem Health and Sustainability* 3(2):e01261.
- Araki, H., B. Cooper, and M. S. Blouin. 2007. Genetic effects of captive breeding cause a rapid, cumulative fitness decline in the wild. *Science* 318(5847):100–103.
- Arendt, A. A., K. A. Echelmeyer, W. D. Harrison, C. S. Lingle, and V. B. Valentine. 2002. Rapid wastage of Alaska glaciers and their contribution to rising sea level. *Science* 297(5580):382–386.
- Arendt, K., R. Ericksen, R. Beamesderfer, and G. Johnston. 2010. Kenai River habitat assessment. Report to the Alaska Department of Fish and Game and Kenai River Sport Fishing Association. Cramer Fish Sciences and Inter-fluve. Available: [http://www.fishsciences.net/reports/2010/Kenai\\_Habitat\\_Report\\_Review\\_2010.pdf](http://www.fishsciences.net/reports/2010/Kenai_Habitat_Report_Review_2010.pdf). (July 2017).
- Arismendi, I., M. Safeeq, J. B. Dunham, and S. L. Johnson. 2014. Can air temperature be used to project influences of climate change on stream temperature? *Environmental Research Letters* 9(8):084015.

- Arsan, E. L., and J. L. Bartholomew. 2008. Potential for dissemination of the nonnative salmonid parasite *Myxobolus cerebralis* in Alaska. *Journal of Aquatic Animal Health* 20(3):136–149.
- Augerot, X., and D. N. Foley. 2005. *Atlas of Pacific Salmon: the first map-based status assessment of salmon in the north Pacific*. University of California Press, Berkeley.
- Bauret, S., and S. L. Stuefer. 2013. Kenai Peninsula precipitation and air temperature trend analysis. Pages 35-44 in S. L. Stuefer, and W. R. Bolton, editors. 19th International Northern Research Basins Symposium and Workshop, Southcentral Alaska, University of Alaska Fairbanks.
- Begich, R. N., J. A. Pawluk, J. L. Cope, and S. Simons. 2013. 2010–2012 Annual management report and 2013 recreational fisheries overview for northern Kenai Peninsula: fisheries under consideration by the Alaska Board of Fisheries, 2014. Alaska Department of Fish and Game, Anchorage.
- Berg, E. E., and R. S. Anderson. 2006. Fire history of white and Lutz spruce forests on the Kenai Peninsula, Alaska, over the last two millennia as determined from soil charcoal. *Forest Ecology and Management* 227(3):275–283.
- Berg, E. E., J. D. Henry, C. L. Fastie, A. D. De Volder, and S. M. Matsuoka. 2006. Spruce beetle outbreaks on the Kenai Peninsula, Alaska, and Kluane National Park and Reserve, Yukon Territory: relationship to summer temperatures and regional differences in disturbance regimes. *Forest Ecology and Management* 227(3):219–232.
- Berg, E. E., K. M. Hillman, R. Dial, and A. DeRuwe. 2009. Recent woody invasion of wetlands on the Kenai Peninsula Lowlands, south-central Alaska: a major regime shift after 18,000

- years of wet *Sphagnum*–sedge peat recruitment. *Canadian Journal of Forest Research* 39(11):2033–2046.
- Bidlack, A. L., L. E. Benda, T. Miewald, G. H. Reeves, and G. McMahan. 2014. Identifying suitable habitat for Chinook Salmon across a large, glaciated watershed. *Transactions of the American Fisheries Society* 143(3):689–699.
- Bliss, A., R. Hock, and V. Radić. 2014. Global response of glacier runoff to twenty-first century climate change. *Journal of Geophysical Research: Earth Surface* 119(4):717–730.
- Bradford, M. J. 1995. Comparative review of Pacific Salmon survival rates. *Canadian Journal of Fisheries and Aquatic Sciences* 52(6):1327–1338.
- Brenner, R. E., S. D. Moffitt, and W. S. Grant. 2012. Straying of hatchery salmon in Prince William Sound, Alaska. *Environmental Biology of Fishes* 94(1):179–195.
- Burger, C. V., W. J. Spearman, and M. A. Cronin. 1997. Genetic differentiation of Sockeye Salmon subpopulations from a geologically young Alaskan lake system. *Transactions of the American Fisheries Society* 126(6):926–938.
- Burger, C. V., R. L. Wilmot, and D. B. Wangaard. 1985. Comparison of spawning areas and times for 2 runs of Chinook Salmon (*Oncorhynchus tshawytscha*) in the Kenai River, Alaska. *Canadian Journal of Fisheries and Aquatic Sciences* 42(4):693–700.
- Carpenter, S. R., S. G. Fisher, N. B. Grimm, and J. F. Kitchell. 1992. Global change and freshwater ecosystems. *Annual Review of Ecology and Systematics* 23:119–139.
- Chapin, F. S. I., S. F. Trainor, P. Cochran, H. Huntington, C. J. Markon, M. McCammon, A. D. McGuire, and M. Serreze. 2014. Alaska. Pages 514–536 in J. M. Melillo, T. Richmond, and G. W. Yohe, editors. *Climate change impacts in the United States: the third National Climate Assessment*. U.S. Global Change Research Program, Washington, D.C.

- Cline, T. J., D. E. Schindler, and R. Hilborn. 2017. Fisheries portfolio diversification and turnover buffer Alaskan fishing communities from abrupt resource and market changes. *Nature Communications* 8:14042.
- Crawford, S., G. Whelan, D. M. Infante, K. Blackhart, W. M. Daniel, P. L. Fuller, T. Birdsong, D. J. Wieferich, R. McClees-Funinan, S. M. Stedman, K. Herreman, and P. Ruhl. 2016. Through a fish's eye: the status of fish habitats in the United States 2015. Available: <http://assessment.fishhabitat.org>. (July 2017).
- Cross, A. D., D. A. Beauchamp, J. L. Armstrong, M. Blikshiteyn, J. L. Boldt, N. D. Davis, L. J. Haldorson, J. H. Moss, K. W. Myers, and R. V. Walker. 2005. Consumption demand of juvenile Pink Salmon in Prince William Sound and the coastal Gulf of Alaska in relation to prey biomass. *Deep-Sea Research Part II—Topical Studies In Oceanography* 52(1–2):347–370.
- Czarnecki, J., and J. Yaeger. 2014. On the River: A guide to owning and managing waterfront property on the Kenai Peninsula, 2nd edition. Kenai Peninsula Borough, River Center, Soldotna, Alaska.
- David, A. T., C. A. Simenstad, J. R. Cordell, J. D. Toft, C. S. Ellings, A. Gray, and H. B. Berge. 2016. Wetland loss, juvenile salmon foraging performance, and density dependence in Pacific Northwest estuaries. *Estuaries and Coasts* 39(3):767–780.
- Deacy, W., W. Leacock, J. B. Armstrong, and J. A. Stanford. 2016. Kodiak brown bears surf the salmon red wave: direct evidence from GPS collared individuals. *Ecology* 97(5):1091–1098.

- Dorava, J. M., and A. M. Milner. 2000. Role of lake regulation on glacier-fed rivers in enhancing salmon productivity: the Cook Inlet watershed, south-central Alaska, USA. *Hydrological Processes* 14(16–17):3149–3159.
- Dunham, J. B., A. E. Rosenberger, C. H. Luce, and B. E. Rieman. 2007. Influences of wildfire and channel reorganization on spatial and temporal variation in stream temperature and the distribution of fish and amphibians. *Ecosystems* 10(2):335–346.
- Dunker, K. J., A. J. Sepulveda, R. L. Massengill, J. B. Olsen, O. L. Russ, J. K. Wenburg, and A. Antonovich. 2016. Potential of environmental DNA to evaluate Northern Pike (*Esox lucius*) eradication efforts: an experimental test and case study. *PLoS One* 11(9):e0162277.
- Edmundson, J., T. Willette, J. Edmundson, D. Schmidt, S. Carlson, B. Bue, and K. Tarbox. 2003. Sockeye Salmon over escapement (Kenai River component). Alaska Department of Fish and Game, Anchorage.
- Edwards, R. T., D. V. D'Amore, E. Norberg, and F. Biles. 2013. Riparian ecology, climate change, and management in North Pacific coastal rainforests. Pages 43–72 in G. H. Orians and J. W. Schoen, editors. *North Pacific temperate rainforests: ecology and conservation*. University of Washington Press, Seattle.
- Fabry, V. J., B. A. Seibel, R. A. Feely, and J. C. Orr. 2008. Impacts of ocean acidification on marine fauna and ecosystem processes. *ICES Journal of Marine Science* 65(3):414–432.
- Fall, J. A., C. L. Brown, S. S. Evans, R. A. Grant, H. Ikuta, L. Hutchinson-Scarborough, B. Jones, M. A. Marchioni, E. Mikow, J. T. Ream, L. A. Sill, and T. Lemons. 2015. Alaska subsistence and personal use salmon fisheries 2013 annual report. Alaska Department of Fish and Game, Division of Subsistence, Anchorage.

Fellman, J. B., E. Hood, D. V. D'Amore, R. T. Edwards, and D. White. 2009. Seasonal changes in the chemical quality and biodegradability of dissolved organic matter exported from soils to streams in coastal temperate rainforest watersheds. *Biogeochemistry* 95(2):277–293.

Fellman, J. B., E. Hood, W. Dryer, and S. Pyare. 2015. Stream physical characteristics impact habitat quality for Pacific Salmon in two temperate coastal watersheds. *PLoS One* 10(7):e0132652.

Fleischman, S. J., and A. M. Reimer. 2017. Spawner-recruit analysis and escapement goal recommendations for Kenai River Chinook Salmon. Alaska Department of Fish and Game, Divisions of Sport Fish and Commercial Fisheries, Anchorage.

Flitcroft, R. L., J. A. Falke, G. H. Reeves, P. F. Hessburg, K. M. McNyset, and L. E. Benda. 2016. Wildfire may increase habitat quality for spring Chinook Salmon in the Wenatchee River subbasin, WA, USA. *Forest Ecology and Management* 359:126–140.

Gho, N. 2014. Overview of permit holdings, harvests, and estimates of gross earnings in the Cook Inlet salmon drift gillnet fishery, 1975–2012. Commercial Fisheries Entry Commission, Juneau, Alaska.

Gibson, R. J. 2017. Salient needs for conservation of Atlantic Salmon. *Fisheries* 42:163–174.

Gracz, M. B., M. F. Moffett, D. I. Siegel, and P. H. Glaser. 2015. Analyzing peatland discharge to streams in an Alaskan watershed: an integration of end-member mixing analysis and a water balance approach. *Journal of Hydrology* 530:667–676.

Griffiths, J. R., D. E. Schindler, J. B. Armstrong, M. D. Scheuerell, D. C. Whited, R. A. Clark, R. Hilborn, C. A. Holt, S. T. Lindley, J. A. Stanford, and E. C. Volk. 2014. Performance of

- salmon fishery portfolios across Western North America. *Journal of Applied Ecology* 51(6):1554–1563.
- Habicht, C., T. M. Tobias, G. Fandrei, N. Webber, B. Lewis, and W. S. Grant. 2013. Homing of Sockeye Salmon within Hidden Lake, Alaska, can be used to achieve hatchery management goals. *North American Journal of Fisheries Management* 33:777–782.
- Hansen, W. D., F. S. Chapin III, H. T. Naughton, T. S. Rupp, and D. Verbyla. 2016. Forest-landscape structure mediates effects of a spruce bark beetle (*Dendroctonus rufipennis*) outbreak on subsequent likelihood of burning in Alaskan boreal forest. *Forest Ecology and Management* 369:38–46.
- Harrison, H. L., and P. A. Loring. 2014. Larger than life: the emergent nature of conflict in Alaska's Upper Cook Inlet salmon fisheries. *SAGE Open* 4(4):1–14.
- Hilborn, R., T. P. Quinn, D. E. Schindler, and D. E. Rogers. 2003. Biocomplexity and fisheries sustainability. *Proceedings of the National Academy of Sciences* 100(11):6564–6568.
- Hill, D., N. Bruhis, S. Calos, A. Arendt, and J. Beamer. 2015. Spatial and temporal variability of freshwater discharge into the Gulf of Alaska. *Journal of Geophysical Research: Oceans* 120(2):634–646.
- Hood, E., and L. Berner. 2009. Effects of changing glacial coverage on the physical and biogeochemical properties of coastal streams in southeastern Alaska. *Journal of Geophysical Research: Biogeosciences* 114:G03001.
- Irvine, J. R., and M. Fukuwaka. 2011. Pacific Salmon abundance trends and climate change. *ICES Journal of Marine Science* 68(6):1122–1130.



- Irvine, J. R., and G. T. Ruggerone. 2016. Provisional estimates of numbers and biomass for natural-origin and hatchery-origin Pink, Chum, and Sockeye Salmon in the North Pacific, 1952–2015. North Pacific Anadromous Fish Commission, Vancouver, B.C., Canada.
- Isaak, D. J., S. Wollrab, D. Horan, and G. Chandler. 2011. Climate change effects on stream and river temperatures across the northwest U.S. from 1980–2009 and implications for salmonid fishes. *Climatic Change* 113(2):499–524.
- Jasper, J. R., C. Habicht, S. Moffitt, R. Brenner, J. Marsh, B. Lewis, E. Creelman Fox, Z. Grauvogel, S. D. Rogers Olive, and W. S. Grant. 2013. Source–sink estimates of genetic introgression show influence of hatchery strays on wild Chum Salmon populations in Prince William Sound, Alaska. *PLoS One* 8(12):e81916.
- Justice, C., S. M. White, D. A. McCullough, D. S. Graves, and M. R. Blanchard. 2017. Can stream and riparian restoration offset climate change impacts to salmon populations? *Journal of Environmental Management* 188:212–227.
- Kane, D. L., and S. L. Stuefer. 2015. Reflecting on the status of precipitation data collection in Alaska: a case study. *Hydrology Research* 46(4):478–493.
- Kasperski, S., and D. S. Holland. 2013. Income diversification and risk for fishermen. *Proceedings of the National Academy of Sciences* 110(6):2076–2081.
- Kenai Peninsula Fish Habitat Partnership. 2014. Strategic plan. Available: [http://www.kenaifishpartnership.org/?page\\_id=303](http://www.kenaifishpartnership.org/?page_id=303). (July 2017).
- Kilduff, D. P., E. Di Lorenzo, L. W. Botsford, and S. L. H. Teo. 2015. Changing central Pacific El Niños reduce stability of North American salmon survival rates. *Proceedings of the National Academy of Sciences* 112(35):10962–10966.

- Klein, E., E. E. Berg, and R. Dial. 2005. Wetland drying and succession across the Kenai Peninsula Lowlands, south-central Alaska. *Canadian Journal of Forest Research* 35(8):1931–1941.
- Knapp, G. 2011. Local permit ownership in Alaska salmon fisheries. *Marine Policy* 35(5):658–666.
- Knudsen, E. E. 2000. Managing Pacific Salmon escapements: the gaps between theory and reality. Chapter 17 *in* E. E. Knudsen, C. R. Steward, D. D. MacDonald, J. E. Williams, and D. W. Reiser, editors. *Sustainable fisheries management: Pacific Salmon*. CRC Press, Boca Raton, Florida.
- Kovach, R. P., S. C. Ellison, S. Pyare, and D. A. Tallmon. 2015. Temporal patterns in adult salmon migration timing across southeast Alaska. *Global Change Biology* 21(5):1821–1833.
- Krupa, M. B. 2016. Who’s who in the Kenai River Fishery SES: a streamlined method for stakeholder identification and investment analysis. *Marine Policy* 71:194–200.
- Kyle, R. E., and T. P. Brabets. 2001. Water temperature of streams in the Cook Inlet basin, Alaska, and implications of climate change. U.S. Geological Survey, Anchorage, Alaska.
- Lawrence, D. J., B. Stewart-Koster, J. D. Olden, A. S. Ruesch, C. E. Torgersen, J. J. Lawler, D. P. Butcher, and J. K. Crown. 2014. The interactive effects of climate change, riparian management, and a nonnative predator on stream-rearing salmon. *Ecological Applications* 24(4):895–912.
- Le Bris, R., F. Paul, H. Frey, and T. Bolch. 2011. A new satellite-derived glacier inventory for western Alaska. *Annals of Glaciology* 52(59):135–143.

- Lenders, H. J. R., T. P. M. Chamuleau, A. J. Hendriks, R. C. G. M. Lauwerier, R. S. E. W. Leuven, and W. C. E. P. Verberk. 2016. Historical rise of waterpower initiated the collapse of salmon stocks. *Scientific Reports* 6:29269.
- Leppi, J. C., D. J. Rinella, R. R. Wilson, and W. M. Loya. 2014. Linking climate change projections for an Alaskan watershed to future Coho Salmon production. *Global Change Biology* 20(6):1808–1820.
- Lewis, B., W. S. Grant, R. E. Brenner, and T. Hamazaki. 2015. Changes in size and age of Chinook Salmon *Oncorhynchus tshawytscha* returning to Alaska. *PLoS One* 10(6):e0130184.
- Lisi, P. J., D. E. Schindler, K. T. Bentley, and G. R. Pess. 2013. Association between geomorphic attributes of watersheds, water temperature, and salmon spawn timing in Alaskan streams. *Geomorphology* 185:78–86.
- Lisi, P. J., D. E. Schindler, T. J. Cline, M. D. Scheuerell, and P. B. Walsh. 2015. Watershed geomorphology and snowmelt control stream thermal sensitivity to air temperature. *Geophysical Research Letters* 42:3380–3388.
- Lord, N., editor. 2016. *Made of salmon: Alaska stories from the Salmon Project*. University of Alaska Press, Fairbanks.
- Loring, P. A. 2016. Toward a theory of coexistence in shared social–ecological systems: the case of Cook Inlet salmon fisheries. *Human Ecology* 44(2):153-165.
- Loring, P. A., H. L. Harrison, and S. C. Gerlach. 2014. Local perceptions of the sustainability of Alaska’s highly contested Cook Inlet salmon fisheries. *Society and Natural Resources* 27(2):185–199.

- Lynch, A. J., B. J. E. Myers, C. Chu, L. A. Eby, J. A. Falke, R. P. Kovach, T. J. Krabbenhoft, T. J. Kwak, J. Lyons, C. P. Paukert, and J. E. Whitney. 2016. Climate change effects on North American inland fish populations and assemblages. *Fisheries* 41:346–361.
- Lynch, J. A., J. S. Clark, N. H. Bigelow, M. E. Edwards, and B. P. Finney. 2002. Geographic and temporal variations in fire history in boreal ecosystems of Alaska. *Journal of Geophysical Research: Atmospheres* 107(D1):8152.
- MacFarlane, W. 2005. Snow River watershed hydrologic condition assessment. U.S. Department of Agriculture, Forest Service, Chugach National Forest, Anchorage, Alaska.
- Mantua, N. J., S. R. Hare, Y. Zhang, J. M. Wallace, and R. C. Francis. 1997. A Pacific interdecadal climate oscillation with impacts on salmon production. *Bulletin of the American Meteorological Society* 78(6):1069–1080.
- Matanuska–Susitna Basin Salmon Habitat Partnership. 2016. Healthy salmon/healthy communities 2014–2015. 12pp. Available: [matsusalmon.org](http://matsusalmon.org) (July 2017).
- Mauger, S., M. McCarty, M. Bernard, and B. Bornemann. 2015. Science-based land conservation: conservation strategies to protect key salmon habitat in lower Kenai Peninsula watersheds. Cook Inletkeeper, Homer, Alaska.
- Mauger, S., R. Shaftel, J. C. Leppi, and D. Rinella. 2017. Summer temperature regimes in southcentral Alaska streams: watershed drivers of variation and potential implications for Pacific Salmon. *Canadian Journal of Fisheries and Aquatic Sciences* 74:702–715.
- McAfee, S. A., G. Guentchev, and J. K. Eischeid. 2013. Reconciling precipitation trends in Alaska: 1. Station-based analyses. *Journal of Geophysical Research: Atmospheres* 118(14):7523–7541.

- McAfee, S., G. Guentchev, and J. K. Eischeid. 2014a. Reconciling precipitation trends in Alaska: 2. Gridded data analyses. *Journal of Geophysical Research: Atmospheres* 119(24):13820–13837.
- McAfee, S. A., J. Walsh, and T. S. Rupp. 2014b. Statistically downscaled projections of snow/rain partitioning for Alaska. *Hydrological Processes* 28(12):3930–3946.
- McCarthy, M. D. 2016. Past and present Sockeye Salmon production in the Kenai River watershed, Alaska. Master's thesis. University of Alaska Anchorage.
- Meehl, G. A., A. Hu, and B. D. Santer. 2009. The mid-1970s climate shift in the Pacific and the relative roles of forced versus inherent decadal variability. *Journal of Climate* 22(3):780–792.
- Mellon, C. D., M. S. Wipfli, and J. L. Li. 2008. Effects of forest fire on headwater stream macroinvertebrate communities in eastern Washington, USA. *Freshwater Biology* 53(11):2331–2343.
- Millar, C. I., and N. L. Stephenson. 2015. Temperate forest health in an era of emerging megadisturbance. *Science* 349(6250):823–826.
- Millar, C. I., N. L. Stephenson, and S. L. Stephens. 2007. Climate change and forests of the future: managing in the face of uncertainty. *Ecological Applications* 17(8):2145–2151.
- Milner, A. M., J. E. Brittain, E. Castella, and G. E. Petts. 2001. Trends of macroinvertebrate community structure in glacier-fed rivers in relation to environmental conditions: a synthesis. *Freshwater Biology* 46(12):1833–1847.
- Milner, A. M., L. E. Brown, and D. M. Hannah. 2009. Hydroecological response of river systems to shrinking glaciers. *Hydrological Processes* 23(1):62–77.

- Milner, A. M., C. L. Fastie, F. S. Chapin, D. R. Engstrom, and L. C. Sharman. 2007. Interactions and linkages among ecosystems during landscape evolution. *Bioscience* 57(3):237–247.
- Milner, A. M., E. E. Knudsen, C. Soiseth, A. L. Robertson, D. Schell, I. T. Phillips, and K. Magnusson. 2000. Colonization and development of stream communities across a 200–year gradient in Glacier Bay National Park, Alaska, USA. *Canadian Journal of Fisheries and Aquatic Sciences* 57(11):2319–2335.
- Montgomery, D. 2003. *King of fish: the thousand-year run of salmon*. Westview Press, Cambridge, Massachusetts.
- Moore, J. W., M. McClure, L. A. Rogers, and D. E. Schindler. 2010. Synchronization and portfolio performance of threatened salmon. *Conservation Letters* 3(5):340–348.
- Morton, J., B. Blackburn, E. Bella, M. Steffy, C. Anderson, R. Massengill, J. Blackwell, L. Ka’ahue, R. Zulueta, and J. Chumley. 2014. Integrated pest management plan for eradicating *Elodea* from the Kenai Peninsula. Prepared for the Kenai Peninsula Cooperative Weed Management Area, Homer, Alaska.
- Morton, J. M., D. Reid, D. Beach, and D. Clark. *In press*. Novel community and trophic assemblages in the northwest boreal region. Chapter 4.2 in A. L. Sessler, A.P. Rockhill, D. R. Magness, D. Reid, J. DeLapp, P. Burton, E. Schroff, V. Barber & C. Markon, editors. *Drivers of landscape change in the northwest boreal region of North America: Implications on policy and land management*. U.S. Geological Survey Press. Reston, Virginia.
- Murphy, M. L., J. Heifetz, J. F. Thedinga, S. W. Johnson, and K. V. Koski. 1989. Habitat utilization by juvenile Pacific Salmon (*Onchorynchus*) in the glacial Taku River,

- Southeast Alaska. *Canadian Journal of Fisheries and Aquatic Sciences* 46(10):1677–1685.
- National Research Council. 1996. *Upstream: salmon and society in the Pacific Northwest*. National Academies Press, Washington, D.C.
- Neal, E. G., E. Hood, and K. Smikrud. 2010. Contribution of glacier runoff to freshwater discharge into the Gulf of Alaska. *Geophysical Research Letters* 37:L06404.
- Nesbitt, H. K., and J. W. Moore. 2016. Species and population diversity in Pacific Salmon fisheries underpin indigenous food security. *Journal of Applied Ecology* 53(5):1489–1499.
- Neuswanger, J. R., M. S. Wipfli, M. J. Evenson, N. F. Hughes, and A. E. Rosenberger. 2015. Low productivity of Chinook Salmon strongly correlates with high summer stream discharge in two Alaskan rivers in the Yukon drainage. *Canadian Journal of Fisheries and Aquatic Sciences* 72(999):1–13.
- Nielsen, J. L., G. T. Ruggione, and C. E. Zimmerman. 2013. Adaptive strategies and life history characteristics in a warming climate: salmon in the Arctic? *Environmental Biology of Fishes* 96(10–11):1187–1226.
- Oasis Environmental. 2010. *Kenai River hydrocarbon assessment, 2009*. Final report prepared for Alaska Department of Environmental Conservation, Anchorage.
- Ohlberger, J., M. D. Scheuerell, and D. E. Schindler. 2016. Population coherence and environmental impacts across spatial scales: a case study of Chinook Salmon. *Ecosphere* 7(4):e01333.
- O’Neel, S., E. Hood, A. Arendt, and L. Sass. 2014. Assessing streamflow sensitivity to variations in glacier mass balance. *Climatic Change* 123(2):329–341.

- O'Neel, S., E. Hood, A. L. Bidlack, S. W. Fleming, M. L. Arimitsu, A. Arendt, E. Burgess, C. J. Sergeant, A. H. Beaudreau, and K. Timm. 2015. Icefield-to-ocean linkages across the northern Pacific coastal temperate rainforest ecosystem. *Bioscience* 65(5):499–512.
- Pawluk, J. A. 2015. Operational plan: Sockeye Salmon escapement studies at the Russian River. Alaska Department of Fish and Game, Anchorage.
- Poesch, M. S., L. Chavarie, C. Chu, S. N. Pandit, and W. Tonn. 2016. Climate change impacts on freshwater fishes: a Canadian perspective. *Fisheries* 41:385–391.
- Quinn, T. 2005. The behavior and ecology of Pacific Salmon and Trout. University of Washington Press, Seattle.
- Rine, K. M., M. S. Wipfli, E. R. Schoen, T. L. Nightengale, and C. A. Stricker. 2016. Trophic pathways supporting juvenile Chinook and Coho Salmon in the glacial Susitna River, Alaska: patterns of freshwater, marine, and terrestrial food resource use across a seasonally dynamic habitat mosaic. *Canadian Journal of Fisheries and Aquatic Sciences* 73(11):1626-1641.
- Rinella, D. J., M. Booz, D. L. Bogan, K. Boggs, M. Sturdy, and M. J. Rinella. 2009. Large woody debris and salmonid habitat in the Anchor River basin, Alaska, following an extensive spruce beetle (*Dendroctonus rufipennis*) outbreak. *Northwest Science* 83(1):57–69.
- Riordan, B., D. Verbyla, and A. D. McGuire. 2006. Shrinking ponds in subarctic Alaska based on 1950–2002 remotely sensed images. *Journal of Geophysical Research: Biogeosciences* 111:G04002.
- Rogers, L. A., and D. E. Schindler. 2008. Asynchrony in population dynamics of Sockeye Salmon in southwest Alaska. *Oikos* 117(10):1578–1586.



- Rogers, L. A., D. E. Schindler, P. J. Lisi, G. W. Holtgrieve, P. R. Leavitt, L. Bunting, B. P. Finney, D. T. Selbie, G. Chen, I. Gregory-Eaves, M. J. Lisac, and P. B. Walsh. 2013. Centennial-scale fluctuations and regional complexity characterize Pacific Salmon population dynamics over the past five centuries. *Proceedings of the National Academy of Sciences* 110(5):1750-1755.
- Roni, P., and T. P. Quinn. 2001. Density and size of juvenile salmonids in response to placement of large woody debris in western Oregon and Washington streams. *Canadian Journal of Fisheries and Aquatic Sciences* 58(2):282–292.
- Roon, D. A., M. S. Wipfli, T. L. Wurtz, and A. L. Blanchard. 2016. Invasive European bird cherry (*Prunus padus*) reduces terrestrial prey subsidies to urban Alaskan salmon streams. *Canadian Journal of Fisheries and Aquatic Sciences* 73(11):1679–1690.
- Ruff, C. P., D. E. Schindler, J. B. Armstrong, K. T. Bentley, G. T. Brooks, G. W. Holtgrieve, M. T. McGlaufflin, C. E. Torgersen, and J. E. Seeb. 2011. Temperature-associated population diversity in salmon confers benefits to mobile consumers. *Ecology* 92(11):2073–2084.
- Ruggerone, G. T., B. A. Agler, B. M. Connors, E. V. Farley Jr, J. R. Irvine, L. I. Wilson, and E. M. Yasumiishi. 2016. Pink and Sockeye Salmon interactions at sea and their influence on forecast error of Bristol Bay Sockeye Salmon. *North Pacific Anadromous Fish Commission Bulletin* 6:349–361.
- Saltmarsh, D. M., M. L. Bowser, J. M. Morton, S. Lang, D. Shain, and R. Dial. 2016. Distribution and abundance of exotic earthworms within a boreal forest system in southcentral Alaska. *NeoBiota* 28:67–86.
- Savereide, J. W. 2005. Inriver abundance, spawning distribution, and run timing of Copper River Chinook Salmon, 2002–2004. Alaska Department of Fish and Game, Anchorage.

- Scannell, P. W. 2012. Taku-Tulsequah River mining activity: background environmental monitoring and potential mining effects. Alaska Department of Fish and Game, Douglas.
- Scenarios Network for Alaska and Arctic Planning. 2016. Available: <http://snap.uaf.edu>. (July 2017).
- Schindler, D. E., J. B. Armstrong, K. T. Bentley, K. Jankowski, P. J. Lisi, and L. X. Payne. 2013. Riding the crimson tide: mobile terrestrial consumers track phenological variation in spawning of an anadromous fish. *Biology Letters* 9(3):20130048.
- Schindler, D. E., X. Augerot, E. Fleishman, N. J. Mantua, B. Riddell, M. Ruckelshaus, J. Seeb, and M. Webster. 2008. Climate change, ecosystem impacts, and management for Pacific Salmon. *Fisheries* 33(10):502–506.
- Schindler, D. E., and R. Hilborn. 2015. Prediction, precaution, and policy under global change. *Science* 347(6225):953–954.
- Schindler, D. E., R. Hilborn, B. Chasco, C. P. Boatright, T. P. Quinn, L. A. Rogers, and M. S. Webster. 2010. Population diversity and the portfolio effect in an exploited species. *Nature* 465(7298):609–612.
- Scholz, N. L., M. S. Myers, S. G. McCarthy, J. S. Labenia, J. K. McIntyre, G. M. Ylitalo, L. D. Rhodes, C. A. Laetz, C. M. Stehr, B. L. French, B. McMillan, D. Wilson, L. Reed, K. D. Lynch, S. Damm, J. W. Davis, and T. K. Collier. 2011. Recurrent die-offs of adult Coho Salmon returning to spawn in Puget Sound lowland urban streams. *PLoS One* 6(12):e28013.
- Sepulveda, A. J., D. S. Rutz, A. W. Dupuis, P. A. Shields, and K. J. Dunker. 2015. Introduced Northern Pike consumption of salmonids in southcentral Alaska. *Ecology of Freshwater Fish* 24(4):519–531.

- Sergeant, C. J., J. R. Bellmore, C. McConnell, and J. W. Moore. 2017. High salmon density and low discharge create periodic hypoxia in coastal rivers. *Ecosphere* 8(6):e01846.
- Sethi, S. A., M. Reimer, and G. Knapp. 2014. Alaskan fishing community revenues and the stabilizing role of fishing portfolios. *Marine Policy* 48:134–141.
- Shanley, C. S., and D. M. Albert. 2014. Climate change sensitivity index for Pacific Salmon habitat in Southeast Alaska. *PLoS One* 9(8):e104799.
- Shanley, C. S., S. Pyare, M. I. Goldstein, P. B. Alaback, D. M. Albert, C. M. Beier, T. J. Brinkman, R. T. Edwards, E. Hood, A. MacKinnon, M. V. McPhee, T. M. Patterson, L. H. Suring, D. A. Tallmon, and M. S. Wipfli. 2015. Climate change implications in the northern coastal temperate rainforest of North America. *Climatic Change* 130(2):155–170.
- Shields, P., and A. Dupuis. 2016. Upper Cook Inlet commercial fisheries annual management report, 2015. Fishery Management Report 16-14. Alaska Department of Fish and Game, Anchorage.
- Shugar, D. H., J. J. Clague, J. L. Best, C. Schoof, M. J. Willis, L. Copland, and G. H. Roe. 2017. River piracy and drainage basin reorganization led by climate-driven glacier retreat. *Nature Geoscience* 10(5):370–375.
- Shulski, M., and G. Wendler. 2007. *The climate of Alaska*. University of Alaska Press, Fairbanks.
- Simpson, E. H. 1949. Measurement of diversity. *Nature* 163:688–688.
- Sloat, M. R., G. H. Reeves, and K. R. Christiansen. 2017. Stream network geomorphology mediates predicted vulnerability of anadromous fish habitat to hydrologic change in southeast Alaska. *Global Change Biology* 23(2):604–620.

- Spromberg, J. A., D. H. Baldwin, S. E. Damm, J. K. McIntyre, M. Huff, C. A. Sloan, B. F. Anulacion, J. W. Davis, and N. L. Scholz. 2016. Coho Salmon spawner mortality in western U.S. urban watersheds: bioinfiltration prevents lethal storm water impacts. *Journal of Applied Ecology* 53(2):398–407.
- Stewart, I. T., D. R. Cayan, and M. D. Dettinger. 2005. Changes toward earlier streamflow timing across Western North America. *Journal of Climate* 18(8):1136–1155.
- Stopha, M. 2017. Alaska fisheries enhancement annual report 2016. Alaska Department of Fish and Game, Anchorage.
- Tobias, T. M., and T. M. Willette. 2013. An estimate of total return of Sockeye Salmon to Upper Cook Inlet, Alaska, 1976–2008. Alaska Department of Fish and Game, Division of Commercial Fisheries, Anchorage.
- Torgersen, C. E., D. M. Price, H. W. Li, and B. A. McIntosh. 1999. Multiscale thermal refugia and stream habitat associations of Chinook Salmon in northeastern Oregon. *Ecological Applications* 9(1):301–319.
- Trammell, E. J., and M. Aisu. 2015. Development of a landscape integrity dataset for the Alaska crucial habitat assessment tool. Prepared for the Alaska Department of Fish and Game, Anchorage.
- U.S. Fish and Wildlife Service. 2016. Species checklist. Kenai National Wildlife Refuge, Soldotna, Alaska.
- VanLooy, J., R. Forster, and A. Ford. 2006. Accelerating thinning of Kenai Peninsula glaciers, Alaska. *Geophysical Research Letters* 33:L21307.

- Vannote, R. L., G. W. Minshall, K. W. Cummins, J. R. Sedell, and C. E. Cushing. 1980. The river continuum concept. *Canadian Journal of Fisheries and Aquatic Sciences* 37(1):130–137.
- Wallace, J. B., S. L. Eggert, J. L. Meyer, and J. R. Webster. 1997. Multiple trophic levels of a forest stream linked to terrestrial litter inputs. *Science* 277(5322):102–104.
- Walters, C. J., and S. J. D. Martell. 2004. *Fisheries ecology and management*. Princeton University Press, Princeton, New Jersey.
- Waples, R. S., G. R. Pess, and T. Beechie. 2008. Evolutionary history of Pacific Salmon in dynamic environments. *Evolutionary Applications* 1(2):189–206.
- Ward, E. J., J. H. Anderson, T. J. Beechie, G. R. Pess, and M. J. Ford. 2015. Increasing hydrologic variability threatens depleted anadromous fish populations. *Global Change Biology* 21(7):2500–2509.
- Williams, J. W., and S. T. Jackson. 2007. Novel climates, no-analog communities, and ecological surprises. *Frontiers in Ecology and the Environment* 5(9):475–482.
- Winfree, M. 2017. The influence of geomorphic and landscape characteristics on stream temperature and streamwater sensitivity to air temperature in the coastal temperate rainforest of Southeast Alaska. M.S. Thesis. University of Alaska Fairbanks.
- Wipfli, M. S. 1997. Terrestrial invertebrates as salmonid prey and nitrogen sources in streams: contrasting old-growth and young-growth riparian forests in southeastern Alaska, USA. *Canadian Journal of Fisheries and Aquatic Sciences* 54(6):1259–1269.
- Wipfli, M. S., and J. S. Richardson. 2015. Riparian management and the conservation of stream ecosystems and fishes. Pages 270–291 *in* G. P. Closs, M. Krkosek, and J. D. Olden, editors. *Conservation of freshwater fishes*. Cambridge University Press, Cambridge, U.K.

- Wobus, C., R. Prucha, D. Albert, C. Woll, M. Loinaz, and R. Jones. 2016. Hydrologic alterations from climate change inform assessment of ecological risk to Pacific Salmon in Bristol Bay, Alaska. *PLoS One* 11(1):e0147242.
- Wolken, J. M., T. N. Hollingsworth, T. S. Rupp, F. S. Chapin, S. F. Trainor, T. M. Barrett, P. F. Sullivan, A. D. McGuire, E. S. Euskirchen, P. E. Hennon, E. A. Beever, J. S. Conn, L. K. Crone, D. V. D'Amore, N. Fresco, T. A. Hanley, K. Kielland, J. J. Kruse, T. Patterson, E. A. G. Schuur, D. L. Verbyla, and J. Yarie. 2011. Evidence and implications of recent and projected climate change in Alaska's forest ecosystems. *Ecosphere* 2(11):1-35.
- Zedler, J. B., and S. Kercher. 2005. Wetland resources: status, trends, ecosystem services, and restorability. *Annual Review of Environment and Resources* 30:39–74.
